# Supplementary material for: Harnessing the potential of biphasic solvent systems in lignocellulosic biomass fractionation through computational insights
Source: Royal Society of Chemistry journal article supplement (doi:10.1039/d4gc05977h), 2025-01-01
Supplement: d4gc05977h1.pdf [file d4gc05977h1.pdf]

Supporting Information

## **Harnessing the Potential of Biphasic Solvent Systems in Lignocellulosic Biomass Fractionation through Computational Insights**

Maryam Saleknezhad <sup>a,b</sup>, Meysam Madadi <sup>a,\*</sup>, Salauddin Al Azad <sup>a</sup>, Vijai Kumar Gupta <sup>c,d\*</sup>

<sup>a</sup> Key Laboratory of Industrial Biotechnology, Ministry of Education, School of Biotechnology, Jiangnan University, Wuxi 214122, China

<sup>b</sup> Department of Biotechnology, Faculty of Biological Science and Technology, University of Isfahan, Isfahan 81746-73441, Iran

<sup>c</sup> School of Biotechnology, Dublin City University, Glasnevin, Dublin, D09 K20V, Ireland

<sup>d</sup> DCU Life Sciences Institute, Dublin City University, Dublin, D09 K20V, Ireland

\*Corresponding author.

E-mail address: [m.madadi@jiangnan.edu.cn](mailto:m.madadi@jiangnan.edu.cn) (M. Madadi),

[vijaikumar.gupta@dcu.ie](mailto:vijaikumar.gupta@dcu.ie) (VK. Gupta)

**Table S1** Review of various biphasic solvent systems used in lignocellulosic biomass fractionation, highlighting their operation condition (catalyst, temperature, time), and performance on fractionation (*i.e.*, Cellulose degradation, hemicellulose removal, and delignification).

| Solvent                 | Biomass                   | Catalyst          | Temperature (°C) | Time (min) | Cellulose degradation% | Hemicellulose removal % | Delignification % | References |
|-------------------------|---------------------------|-------------------|------------------|------------|------------------------|-------------------------|-------------------|------------|
| MeTHF/H <sub>2</sub> O  | Bamboo                    | OA                | 120              | 20         | 36.8                   | 48.4                    | 24.0              | 1          |
| MeTHF/ H <sub>2</sub> O | Bamboo                    | OA                | 140              | 20         | 25.0                   | 84.0                    | 35.0              |            |
| MeTHF/ H <sub>2</sub> O | Bamboo                    | OA                | 160              | 20         | 20.1                   | 96.0                    | 45.0              |            |
| MeTHF/ H <sub>2</sub> O | Bamboo                    | OA                | 180              | 20         | 18.7                   | 99.3                    | 56.0              |            |
| MeTHF/ H <sub>2</sub> O | Birch wood                | AlCl <sub>3</sub> | 140              | 60         | 15.0                   | 70.0                    | 12.5              | 2          |
| MeTHF/ H <sub>2</sub> O | Birch wood                | AlCl <sub>3</sub> | 150              | 60         | 28.0                   | 85.0                    | 41.6              |            |
| MeTHF/ H <sub>2</sub> O | Birch wood                | AlCl <sub>3</sub> | 160              | 60         | 19.5                   | 95.0                    | 58.3              |            |
| MeTHF/ H <sub>2</sub> O | Birch wood                | AlCl <sub>3</sub> | 170              | 60         | 26.7                   | 100                     | 66.6              |            |
| MeTHF/ H <sub>2</sub> O | Birch wood                | AlCl <sub>3</sub> | 180              | 60         | 38.5                   | 100                     | 75.0              |            |
| MeTHF/ H <sub>2</sub> O | Birch wood                | FeCl <sub>3</sub> | 180              | 60         | 32.1                   | 100                     | 62.5              |            |
| MeTHF/ H <sub>2</sub> O | Birch wood                | CuCl <sub>2</sub> | 180              | 60         | 23.0                   | 100                     | 58.3              |            |
| MeTHF/ H <sub>2</sub> O | Birch wood                | NiCl <sub>2</sub> | 180              | 60         | 21.2                   | 80.0                    | 54.1              |            |
| MeTHF/ H <sub>2</sub> O | Beech wood                | OA                | 140              | 180        | 46.6                   | 80.5                    | 86.4              | 3          |
| MeTHF/ H <sub>2</sub> O | Beech wood                | FDCA              | 140              | 180        | 35.9                   | 90.7                    | 92.0              |            |
| MeTHF/ H <sub>2</sub> O | Beech wood                | FDCA              | 150              | 180        | 43.1                   | 83.6                    | 88.8              |            |
| MeTHF/ H <sub>2</sub> O | Beech wood                | FDCA              | 160              | 180        | 51.3                   | 83.4                    | 82.7              |            |
| MeTHF/ H <sub>2</sub> O | Beech wood                | FDCA              | 160              | 120        | 45.4                   | 85.8                    | 87.4              |            |
| MeTHF/ H <sub>2</sub> O | Beech wood                | FDCA              | 160              | 60         | 40.4                   | 86.1                    | 90.4              |            |
| MeTHF/ H <sub>2</sub> O | empty fruit bunches (EFB) | FDCA              | 160              | 180        | 28.5                   | 97.0                    | 80.5              | 4          |
| MeTHF/ H <sub>2</sub> O | Bagasse                   | AlCl <sub>3</sub> | 150              | 45         | N/A                    | N/A                     | 63.5              | 5          |
| MeTHF/ H <sub>2</sub> O | Beech wood                | OA                | 140              | 180        | N/A                    | N/A                     | 87.0              | 6          |
| MeTHF/ H <sub>2</sub> O | Beech wood                | OA                | 125              | 360        | N/A                    | N/A                     | 87.0              |            |
| MeTHF/ H <sub>2</sub> O | Beech wood                | OA                | 140              | 180        | N/A                    | N/A                     | 86.0              |            |
| MeTHF/ H <sub>2</sub> O | Rice straw                | OA                | 148              | 25         | 19.4                   | 74.6                    | 60.8              | 7          |
| MeTHF/ H <sub>2</sub> O | Rice straw                | OA                | 125              | 25         | 22.6                   | 52.3                    | 63.6              |            |

|                         |               |                                |     |     |      |      |      |    |
|-------------------------|---------------|--------------------------------|-----|-----|------|------|------|----|
| MeTHF/ H <sub>2</sub> O | Rice straw    | OA                             | 125 | 45  | 1.01 | 58.9 | 16.3 |    |
| MeTHF/ H <sub>2</sub> O | Rice straw    | OA                             | 125 | 25  | 16.1 | 55.6 | 71.4 |    |
| MeTHF/ H <sub>2</sub> O | Rice straw    | OA                             | 125 | 45  | 15.1 | 60.1 | 42.3 |    |
| MeTHF/ H <sub>2</sub> O | Rice straw    | OA                             | 160 | 25  | 42.5 | 64.2 | 53.1 |    |
| MeTHF/ H <sub>2</sub> O | Rice straw    | OA                             | 160 | 45  | 27.9 | 65.1 | 25.3 |    |
| MeTHF/ H <sub>2</sub> O | Rice straw    | OA                             | 160 | 25  | 23.6 | 85.7 | 55.2 |    |
| MeTHF/ H <sub>2</sub> O | Rice straw    | OA                             | 160 | 45  | 25.0 | 88.7 | 46.6 |    |
| MeTHF/ H <sub>2</sub> O | Wheat straw   | Citric acid                    | 120 | 180 | 8.7  | 34.3 | 26.5 |    |
| MeTHF/ H <sub>2</sub> O | Wheat straw   | Adipic acid                    | 120 | 180 | 7.6  | 22.9 | 10.3 |    |
| MeTHF/ H <sub>2</sub> O | Wheat straw   | Fumaric acid                   | 120 | 180 | 0.2  | 28.8 | 3.7  |    |
| MeTHF/ H <sub>2</sub> O | Wheat straw   | Glutaric acid                  | 120 | 180 | 2.8  | 23.6 | 10.3 |    |
| MeTHF/ H <sub>2</sub> O | Wheat straw   | Tartaric acid                  | 120 | 180 | 8.1  | 32.5 | 14.7 |    |
| MeTHF/ H <sub>2</sub> O | Wheat straw   | Succinic acid                  | 120 | 180 | 7.4  | 26.3 | 9.2  |    |
| MeTHF/ H <sub>2</sub> O | Wheat straw   | Acetic acid                    | 120 | 180 | 8.3  | 34.0 | 3.2  |    |
| MeTHF/ H <sub>2</sub> O | Wheat straw   | L-lysine                       | 120 | 180 | 11.2 | 28.4 | 5.0  |    |
| MeTHF/ H <sub>2</sub> O | Wheat straw   | Acetylsalicylic acid           | 120 | 180 | 4.2  | 30.0 | 3.0  |    |
| MeTHF/ H <sub>2</sub> O | Wheat straw   | Gallic acid                    | 120 | 180 | 2.6  | 30.2 | 0    |    |
| MeTHF/ H <sub>2</sub> O | Wheat straw   | Propionic acid                 | 120 | 180 | 4.4  | 19.5 | 10.7 | 8  |
| MeTHF/ H <sub>2</sub> O | Wheat straw   | Formic acid                    | 120 | 180 | 6.7  | 24.3 | 13.2 |    |
| MeTHF/ H <sub>2</sub> O | Wheat straw   | N-butyric acid                 | 120 | 180 | 6.2  | 20.7 | 16.0 |    |
| MeTHF/ H <sub>2</sub> O | Wheat straw   | Lactic acid                    | 120 | 180 | 7.5  | 24.1 | 12.4 |    |
| MeTHF/ H <sub>2</sub> O | Wheat straw   | H <sub>2</sub> SO <sub>4</sub> | 120 | 180 | 8.4  | 68.6 | 42.7 |    |
| MeTHF/ H <sub>2</sub> O | Wheat straw   | OA                             | 120 | 180 | 7.6  | 53.2 | 33.1 |    |
| MeTHF/ H <sub>2</sub> O | Wheat straw   | L-Malic acid                   | 120 | 180 | 8.3  | 36.1 | 30.7 |    |
| MeTHF/ H <sub>2</sub> O | Wheat straw   | Malonic acid                   | 120 | 180 | 3.4  | 27.2 | 12.7 |    |
| MeTHF/ H <sub>2</sub> O | Wheat straw   | Maleic acid                    | 120 | 180 | 6.1  | 35.9 | 22.6 |    |
| MeTHF/ H <sub>2</sub> O | Wheat straw   | p-TsOH                         | 120 | 180 | 3.7  | 74.9 | 47.6 |    |
| MeTHF/ H <sub>2</sub> O | Cornstalk     | H <sub>2</sub> SO <sub>4</sub> | 170 | 60  | 16.  | 68.1 | 37.5 | 9  |
| MeTHF/ H <sub>2</sub> O | Almond shells | H <sub>2</sub> SO <sub>4</sub> | 150 | 0   | 37.5 | 99.2 | 56.0 | 10 |

|                                  |                   |                                |     |     |      |       |      |    |
|----------------------------------|-------------------|--------------------------------|-----|-----|------|-------|------|----|
| MeTHF/ H <sub>2</sub> O          | Beech wood        | H <sub>2</sub> SO <sub>4</sub> | 145 | 60  | N/A  | N/A   | 70.0 | 11 |
| MeTHF/ H <sub>2</sub> O          | Rice straw        | H <sub>2</sub> SO <sub>4</sub> | 130 | 120 | 15.6 | 86.6  | 26.5 | 12 |
| MeTHF/ H <sub>2</sub> O          | Candlenut         | HCl                            | 180 | 20  | N/A  | N/A   | 79.4 | 13 |
| MeTHF/ H <sub>2</sub> O          | Rice straw        | H <sub>2</sub> SO <sub>4</sub> | 110 | 60  | 20.0 | 76.0  | 17.0 | 14 |
| MeTHF/ H <sub>2</sub> O          | Poplar wood       | AlCl <sub>3</sub>              | 140 | 45  | N/A  | 83.0  | 73.5 | 15 |
| Phenoxyethanol/ H <sub>2</sub> O | Rice straw        | H <sub>2</sub> SO <sub>4</sub> | 130 | 60  | 17.0 | 87.0  | 60.0 | 16 |
| Phenoxyethanol/ H <sub>2</sub> O | Rice straw        | H <sub>2</sub> SO <sub>4</sub> | 120 | 180 | 87.3 | 90.1  | 53.1 | 14 |
| Phenoxyethanol/ H <sub>2</sub> O | Bamboo            | H <sub>2</sub> SO <sub>4</sub> | 120 | 60  | N/A  | 90.0  | 90.0 | 17 |
| Phenoxyethanol/ H <sub>2</sub> O | Bamboo            | H <sub>2</sub> SO <sub>4</sub> | 100 | 60  | N/A  | 75.0  | 70.0 |    |
| Phenoxyethanol/ H <sub>2</sub> O | Amorpha fruticosa | H <sub>2</sub> SO <sub>4</sub> | 110 | 30  | 2.4  | 61.0  | 30.0 | 18 |
| Phenoxyethanol/ H <sub>2</sub> O | Amorpha fruticosa | H <sub>2</sub> SO <sub>4</sub> | 130 | 70  | 26.6 | 90.0  | 71.5 |    |
| Phenoxyethanol/ H <sub>2</sub> O | Amorpha fruticosa | H <sub>2</sub> SO <sub>4</sub> | 140 | 90  | 26.3 | 100   | 88.4 |    |
| Phenoxyethanol/ H <sub>2</sub> O | Rice straw        | H <sub>2</sub> SO <sub>4</sub> | 130 | 120 | 13.5 | 92.1  | 63.1 | 12 |
| Phenoxyethanol/ H <sub>2</sub> O | Vinegar residue   | Maleic acid                    | 120 | 60  | 14.7 | 53.2  | 48.5 | 19 |
| Phenoxyethanol/ H <sub>2</sub> O | Vinegar residue   | Maleic acid                    | 140 | 60  | 17.8 | 73.8  | 69.2 |    |
| Phenoxyethanol/ H <sub>2</sub> O | Vinegar residue   | Maleic acid                    | 160 | 60  | 17.3 | 82.6  | 78.5 |    |
| Phenoxyethanol/H <sub>2</sub> O  | Rice straw        | NaOH                           | 80  | 30  | 94.9 | 34.1  | 82.1 | 20 |
| Phenoxyethanol/H <sub>2</sub> O  | Rice straw        | NaOH                           | 55  | 120 | 92.2 | 40.3  | 78.1 |    |
| MIBK/H <sub>2</sub> O            | Eucalyptus        | Formic acid                    | 140 | 60  | 7.2  | 79.3  | 19.5 | 21 |
| MIBK/ H <sub>2</sub> O           | Eucalyptus        | Formic acid                    | 160 | 60  | 23.4 | 97.7  | 35.8 |    |
| MIBK/ H <sub>2</sub> O           | Eucalyptus        | Formic acid                    | 180 | 60  | 42.6 | 98.3  | 43.6 |    |
| MIBK/ H <sub>2</sub> O           | Eucalyptus        | Formic acid                    | 200 | 60  | 64.4 | 100   | 72.6 |    |
| MIBK/ H <sub>2</sub> O           | Amorpha fruticosa | H <sub>2</sub> SO <sub>4</sub> | 120 | 50  | 26.6 | 73.38 | 21.1 | 18 |
| MIBK/ H <sub>2</sub> O           | Amorpha fruticosa | H <sub>2</sub> SO <sub>4</sub> | 140 | 30  | 34.3 | 89.1  | 25.4 |    |
| MIBK/ H <sub>2</sub> O           | Amorpha fruticosa | H <sub>2</sub> SO <sub>4</sub> | 140 | 50  | 20.3 | 100   | 30.6 |    |

|                            |                     |                                                      |     |     |       |       |      |    |
|----------------------------|---------------------|------------------------------------------------------|-----|-----|-------|-------|------|----|
| MIBK/ H <sub>2</sub> O     | Amorpha fruticosa   | H <sub>2</sub> SO <sub>4</sub>                       | 140 | 120 | 36.4  | 100   | 18.5 |    |
| MIBK/ H <sub>2</sub> O     | Rice straw          | H <sub>2</sub> SO <sub>4</sub>                       | 130 | 120 | 17.1  | 88.1  | 27.7 | 12 |
| MIBK/ H <sub>2</sub> O     | Rice straw          | H <sub>2</sub> SO <sub>4</sub>                       | 110 | 60  | 19.0  | 69.0  | 17.0 | 14 |
| MIBK/ H <sub>2</sub> O     | Eucalyptus          | FeCl <sub>3</sub>                                    | 180 | 60  | 69.67 | 100   | 58.1 | 22 |
| MIBK/ H <sub>2</sub> O     | Eucalyptus          | FeCl <sub>3</sub>                                    | 180 | 60  | N/A   | N/A   | 40.3 | 23 |
| MIBK/ H <sub>2</sub> O     | Beechwood           | H <sub>2</sub> SO <sub>4</sub>                       | 175 | 60  | 16.2  | 96.6  | 49.4 | 24 |
| MIBK/ H <sub>2</sub> O     | Corn stalk          | Al(NO <sub>3</sub> ) <sub>3</sub> ·9H <sub>2</sub> O | 140 | 60  | 23.16 | 58.8  | 19.7 | 25 |
| MIBK/ H <sub>2</sub> O     | Corn stalk          | Al(NO <sub>3</sub> ) <sub>3</sub> ·9H <sub>2</sub> O | 160 | 60  | 33.86 | 90.8  | 20.6 |    |
| MIBK/ H <sub>2</sub> O     | Switchgrass         | H <sub>2</sub> SO <sub>4</sub>                       | 170 | 30  | N/A   | 77.2  | 23.0 | 26 |
| MIBK/ H <sub>2</sub> O     | Switchgrass         | H <sub>2</sub> SO <sub>4</sub>                       | 170 | 45  | N/A   | 81.8  | 24.0 |    |
| MIBK/ H <sub>2</sub> O     | Switchgrass         | H <sub>2</sub> SO <sub>4</sub>                       | 170 | 60  | 26.7  | 90.0  | 24.0 |    |
| MIBK/ H <sub>2</sub> O     | Eucalyptus          | AlCl <sub>3</sub> /DES                               | 100 | 30  | 0.9   | 64.1  | 6.9  | 27 |
| MIBK/H <sub>2</sub> O      | Eucalyptus          | AlCl <sub>3</sub> /DES                               | 100 | 90  | 2.3   | 76.3  | 17.9 |    |
| MIBK/H <sub>2</sub> O      | Eucalyptus          | AlCl <sub>3</sub> /DES                               | 120 | 30  | 2.1   | 86.1  | 14.9 |    |
| MIBK/H <sub>2</sub> O      | Eucalyptus          | AlCl <sub>3</sub> /DES                               | 120 | 90  | 5.6   | 95.3  | 34.2 |    |
| MIBK/H <sub>2</sub> O      | Eucalyptus          | AlCl <sub>3</sub> /DES                               | 140 | 30  | 6.1   | 93.6  | 29.2 |    |
| MIBK/H <sub>2</sub> O      | Eucalyptus          | AlCl <sub>3</sub> /DES                               | 140 | 90  | 11.7  | 98.2  | 52.4 |    |
| MIBK/H <sub>2</sub> O      | Eucalyptus          | AlCl <sub>3</sub> /DES                               | 160 | 30  | 10.3  | 95.3  | 44.5 |    |
| MIBK/H <sub>2</sub> O      | Eucalyptus          | AlCl <sub>3</sub> /DES                               | 160 | 90  | 13.4  | 100   | 66.4 |    |
| MIBK/H <sub>2</sub> O      | Wheat straw         | CrPO <sub>4</sub>                                    | 180 | 90  | N/A   | 88.0  | N/A  | 28 |
| MIBK/H <sub>2</sub> O      | Maple wood          | H <sub>2</sub> SO <sub>4</sub>                       | 170 | 70  | 20.0  | 100   | 75.0 | 29 |
| MIBK/H <sub>2</sub> O      | Corn stover         | H <sub>2</sub> SO <sub>4</sub>                       | 170 | 20  | N/A   | 98.0  | N/A  | 30 |
| Pentanol /H <sub>2</sub> O | Poplar wood         | p-TsOH                                               | 140 | 45  | N/A   | 98.1  | 88.3 | 15 |
| Pentanol /H <sub>2</sub> O | Acacia Confusa wood | H <sub>2</sub> SO <sub>4</sub>                       | 170 | 60  | 11.0  | 92.0  | 70.2 | 31 |
| Pentanol /H <sub>2</sub> O | Bamboo              | H <sub>2</sub> SO <sub>4</sub>                       | 120 | 30  | 7.17  | 84.47 | 81.5 | 32 |
| Pentanol /H <sub>2</sub> O | Bamboo              | H <sub>2</sub> SO <sub>4</sub>                       | 130 | 20  | 9.04  | 96.2  | 87.8 |    |
| Pentanol /H <sub>2</sub> O | Bamboo              | H <sub>2</sub> SO <sub>4</sub>                       | 140 | 20  | 27.8  | 97.3  | 95.9 |    |

|                            |                     |                                |          |     |      |      |      |    |
|----------------------------|---------------------|--------------------------------|----------|-----|------|------|------|----|
| Pentanol /H <sub>2</sub> O | Sorghum bagasse     | H <sub>2</sub> SO <sub>4</sub> | 180      | 45  | 28.1 | 90.0 | 74.3 | 33 |
| Pentanol /H <sub>2</sub> O | Aspen               | H <sub>2</sub> SO <sub>4</sub> | 100      | 60  | 4.1  | 59.5 | 47.0 | 34 |
| Pentanol /H <sub>2</sub> O | Aspen               | H <sub>2</sub> SO <sub>4</sub> | 130      | 60  | 7.2  | 71.0 | 61.4 |    |
| Pentanol /H <sub>2</sub> O | Aspen               | H <sub>2</sub> SO <sub>4</sub> | 160      | 60  | 8.9  | 85.0 | 91.0 |    |
| Pentanol /H <sub>2</sub> O | Pine                | H <sub>2</sub> SO <sub>4</sub> | 170      | 45  | 7.9  | 89.2 | 88.5 | 35 |
| Pentanol /H <sub>2</sub> O | Wheat straw         | H <sub>2</sub> SO <sub>4</sub> | 170      | 45  | 5.5  | 93.3 | 89.7 |    |
| Pentanol /H <sub>2</sub> O | Aspen               | p-TsOH                         | 80       | 40  | N/A  | 39.0 | 33.0 | 36 |
| Pentanol /H <sub>2</sub> O | Aspen               | p-TsOH                         | 100      | 40  | N/A  | 67.0 | 63.0 |    |
| Pentanol /H <sub>2</sub> O | Aspen               | p-TsOH                         | 120      | 40  | 4.2  | 98.2 | 85.5 |    |
| Pentanol /H <sub>2</sub> O | Aspen               | p-TsOH                         | 140      | 40  | N/A  | 97.0 | 90.0 |    |
| Pentanol /H <sub>2</sub> O | Aspen               | p-TsOH                         | 160      | 40  | N/A  | 95.0 | 92.0 |    |
| Pentanol /H <sub>2</sub> O | Poplar              | p-TsOH/mannitol                | 120      | 40  | 7.0  | 95.1 | 92.8 | 37 |
| Butanol/H <sub>2</sub> O   | Eucalyptus          | H <sub>2</sub> SO <sub>4</sub> | 180      | 45  | 17.0 | 64.7 | 72.0 | 38 |
| Butanol/H <sub>2</sub> O   | Sorghum bagasse     | H <sub>2</sub> SO <sub>4</sub> | 200      | 60  | 2.0  | 90.0 | 78.0 | 39 |
| Butanol/H <sub>2</sub> O   | Sorghum bagasse     | H <sub>2</sub> SO <sub>4</sub> | 180      | 45  | 8.9  | 93.0 | 64.7 | 33 |
| Butanol/H <sub>2</sub> O   | Sorghum bagasse     | H <sub>2</sub> SO <sub>4</sub> | 200      | 120 | 19.0 | 63.0 | 58.0 | 40 |
| Butanol/H <sub>2</sub> O   | Vine shoots         | H <sub>2</sub> SO <sub>4</sub> | 190      | 20  | 15.3 | 98.0 | 67.8 | 41 |
| Butanol/H <sub>2</sub> O   | Wheat straw         | H <sub>2</sub> SO <sub>4</sub> | 160      | 20  | 9.8  | 93.5 | 62.0 | 42 |
| Butanol/H <sub>2</sub> O   | Beech wood          | H <sub>2</sub> SO <sub>4</sub> | 175      | 120 | 0.1  | 73.6 | 97.0 | 43 |
| Butanol/H <sub>2</sub> O   | Pinus pinaster wood | H <sub>2</sub> SO <sub>4</sub> | 190      | 10  | 13.0 | 97.0 | 92.4 | 44 |
| Butanol/H <sub>2</sub> O   | Poplar wood         | H <sub>2</sub> SO <sub>4</sub> | 140      | 45  | N/A  | 97.2 | 77.9 | 15 |
| Butanol/H <sub>2</sub> O   | Arundo donax        | H <sub>2</sub> SO <sub>4</sub> | 180      | 20  | 22.7 | 95.2 | 85.0 | 45 |
| Butanol/H <sub>2</sub> O   | Arundo donax        | H <sub>2</sub> SO <sub>4</sub> | 180      | 20  | 33.3 | 97.9 | 86.7 |    |
| Butanol/H <sub>2</sub> O   | Druff               | HCl                            | (reflux) | 360 | N/A  | 68.4 | N/A  | 46 |

**Table S2** The review of enzymatic hydrolysis conversion of solid residue of biphasic solvent system pretreatment.

| Solvent                 | Acid Catalyst     | Temperature (°C) | Time (min) | Time(h) | Solid loading (%) | Enzyme                                                                 | Enzymatic hydrolysis conversion (%) |      | References |
|-------------------------|-------------------|------------------|------------|---------|-------------------|------------------------------------------------------------------------|-------------------------------------|------|------------|
| MeTHF/ H <sub>2</sub> O | OA                | 120              | 20         | 96      | 2%                | 20 FPU/g<br>endoglucanases,<br>exoglucanases,<br>$\beta$ -glucosidases | 20.4                                |      | 1          |
| MeTHF/ H <sub>2</sub> O | OA                | 140              | 20         |         |                   |                                                                        | 50.0                                |      |            |
| MeTHF/ H <sub>2</sub> O | OA                | 160              | 20         |         |                   |                                                                        | 89.0                                |      |            |
| MeTHF/ H <sub>2</sub> O | OA                | 180              | 20         |         |                   |                                                                        | 92.9                                |      |            |
| MeTHF/ H <sub>2</sub> O | AlCl <sub>3</sub> | 140              | 60         | 72      | 2%                | 15 FPU/g<br>cellulase                                                  | 12.0                                |      | 2          |
| MeTHF/ H <sub>2</sub> O | AlCl <sub>3</sub> | 150              | 60         |         |                   |                                                                        | 15.5                                |      |            |
| MeTHF/ H <sub>2</sub> O | AlCl <sub>3</sub> | 160              | 60         |         |                   |                                                                        | 23.0                                |      |            |
| MeTHF/H <sub>2</sub> O  | AlCl <sub>3</sub> | 170              | 60         |         |                   |                                                                        | 49.0                                |      |            |
| MeTHF/ H <sub>2</sub> O | AlCl <sub>3</sub> | 180              | 60         |         |                   |                                                                        | 77.0                                |      |            |
| MeTHF/ H <sub>2</sub> O | FeCl <sub>3</sub> | 180              | 60         |         |                   |                                                                        | 41.0                                |      |            |
| MeTHF/ H <sub>2</sub> O | CuCl <sub>2</sub> | 180              | 60         |         |                   |                                                                        | 46.0                                |      |            |
| MeTHF/ H <sub>2</sub> O | NiCl <sub>2</sub> | 180              | 60         |         |                   |                                                                        | 56.0                                |      |            |
| MeTHF/ H <sub>2</sub> O | OA                | 140              | 180        | 72      | 2%                | 60 FPU/g<br>Accellerase® 1500                                          | 23.0                                |      | 3          |
| MeTHF/ H <sub>2</sub> O | FDCA              | 140              | 180        |         |                   |                                                                        | 13.0                                |      |            |
| MeTHF/ H <sub>2</sub> O | FDCA              | 150              | 180        |         |                   |                                                                        | 26.0                                |      |            |
| MeTHF/ H <sub>2</sub> O | FDCA              | 160              | 180        |         |                   |                                                                        | 46.0                                |      |            |
| MeTHF/ H <sub>2</sub> O | FDCA              | 160              | 120        |         |                   |                                                                        | 34.0                                |      |            |
| MeTHF/ H <sub>2</sub> O | FDCA              | 160              | 60         |         |                   |                                                                        | 19.0                                |      |            |
| MeTHF/ H <sub>2</sub> O | FDCA              | 160              | 180        | 72      | 2%                | 60 FPU/g<br>Accellerase® 1500                                          | 73.0                                |      | 4          |
| MeTHF/ H <sub>2</sub> O | AlCl <sub>3</sub> | 150              | 45         | 96      | 2.5%              | $\beta$ -glucosidases, cellulase                                       | 5 FPU                               | 46.4 | 5          |
|                         |                   |                  |            |         |                   |                                                                        | 10 FPU                              | 58.4 |            |
|                         |                   |                  |            |         |                   |                                                                        | 15 FPU                              | 68.8 |            |
|                         |                   |                  |            |         |                   |                                                                        | 30 FPU                              | 89.3 |            |
| MeTHF/ H <sub>2</sub> O | OA                | 148              | 25         | 72      | 6%                | 15 FPU/g,<br>cellulase, $\beta$ -glucosidases,                         | 42.7                                |      | 7          |

|                                  |                                |     |     |    |      |                            |      |    |
|----------------------------------|--------------------------------|-----|-----|----|------|----------------------------|------|----|
| MeTHF/ H <sub>2</sub> O          | OA                             | 125 | 25  |    | 6%   |                            | 59.0 |    |
|                                  |                                |     |     |    | 8%   |                            | 38.0 |    |
| MeTHF/ H <sub>2</sub> O          | OA                             | 125 | 45  |    | 6%   |                            | 41.0 |    |
|                                  |                                |     |     |    | 8%   |                            | 31.0 |    |
| MeTHF/ H <sub>2</sub> O          | OA                             | 125 | 25  |    | 6%   |                            | 45.0 |    |
|                                  |                                |     |     |    | 8%   |                            | 37.0 |    |
| MeTHF/ H <sub>2</sub> O          | OA                             | 125 | 45  |    | 6%   |                            | 44.0 |    |
|                                  |                                |     |     |    | 8%   |                            | 30.0 |    |
| MeTHF/ H <sub>2</sub> O          | OA                             | 160 | 25  |    | 6%   |                            | 79.0 |    |
|                                  |                                |     |     |    | 8%   |                            | 31.0 |    |
| MeTHF/ H <sub>2</sub> O          | OA                             | 160 | 45  |    | 6%   |                            | 75.0 |    |
|                                  |                                |     |     |    | 8%   |                            | 40.0 |    |
| MeTHF/ H <sub>2</sub> O          | OA                             | 160 | 25  |    | 6%   |                            | 74.0 |    |
|                                  |                                |     |     |    | 8%   |                            | 48.0 |    |
| MeTHF/ H <sub>2</sub> O          | OA                             | 160 | 45  |    | 6%   |                            | 73.0 |    |
|                                  |                                |     |     |    | 8%   |                            | 39.0 |    |
| MeTHF/ H <sub>2</sub> O          | p-TsOH                         | 100 | 180 | 72 | 2%   | 20 FPU/g,<br>cellulase     | 68.9 | 8  |
|                                  |                                | 120 |     |    |      |                            | 84.0 |    |
|                                  |                                | 140 |     |    |      |                            | 95.5 |    |
|                                  |                                | 160 |     |    |      |                            | 97.0 |    |
|                                  |                                | 180 |     |    |      |                            | 99.4 |    |
| MeTHF/ H <sub>2</sub> O          | H <sub>2</sub> SO <sub>4</sub> | 170 | 60  | 72 | 2%   | 15 FPU/g,<br>cellulases    | 78.9 | 9  |
| Phenoxyethanol/ H <sub>2</sub> O | H <sub>2</sub> SO <sub>4</sub> | 120 | 180 | 72 | 2.5% | 20 FPU/g<br>cellulases     | 88.0 | 14 |
| Phenoxyethanol/ H <sub>2</sub> O | H <sub>2</sub> SO <sub>4</sub> | 120 | 60  | 72 | 5%   | 10 FPU/g<br>cellulases     | 79.2 | 17 |
| Phenoxyethanol/ H <sub>2</sub> O | H <sub>2</sub> SO <sub>4</sub> | 100 | 60  |    |      |                            | 30.7 |    |
| Phenoxyethanol/ H <sub>2</sub> O | H <sub>2</sub> SO <sub>4</sub> | 130 | 120 | 72 | 2%   | 191.7 FPU/g,<br>cellulases | 87.0 | 12 |
| Phenoxyethanol/ H <sub>2</sub> O | Maleic acid                    | 120 | 60  | 72 | 2%   | 15 FPU/g<br>cellulases     | 46.0 | 19 |
| Phenoxyethanol/ H <sub>2</sub> O | Maleic acid                    | 140 | 60  |    |      |                            | 72.0 |    |
| Phenoxyethanol/ H <sub>2</sub> O | Maleic acid                    | 160 | 60  |    |      |                            | 82.7 |    |
| Phenoxyethanol/ H <sub>2</sub> O | NaOH                           | 80  | 30  | 72 | 2.5% | 20 FPU/g<br>cellulases     | 82.5 | 20 |
| Phenoxyethanol/ H <sub>2</sub> O | NaOH                           | 55  | 120 |    |      |                            | 80.0 |    |



|                             |                                                       |     |    |        |      |                                                                       |        |      |    |
|-----------------------------|-------------------------------------------------------|-----|----|--------|------|-----------------------------------------------------------------------|--------|------|----|
| MIBK/H <sub>2</sub> O       | Formic acid                                           | 140 | 60 | 72     | 2%   | 17 FPU/g cellulase                                                    | 25.0   |      | 21 |
| MIBK/ H <sub>2</sub> O      | Formic acid                                           | 160 | 60 |        |      |                                                                       | 32.0   |      |    |
| MIBK/ H <sub>2</sub> O      | Formic acid                                           | 180 | 60 |        |      |                                                                       | 70.0   |      |    |
| MIBK/ H <sub>2</sub> O      | Formic acid                                           | 200 | 60 |        |      |                                                                       | 78.0   |      |    |
| MIBK/ H <sub>2</sub> O      | FeCl <sub>3</sub>                                     | 180 | 60 | 36     | 1%   | 20 FPU/g Cellulase (endoglucanases, β-glucosidases and exoglucanases) | 87.0   |      | 22 |
| MIBK/ H <sub>2</sub> O      | H <sub>2</sub> SO <sub>4</sub>                        | 175 | 60 | 24     | 2%   | 8.4 mg/g Cellic® CTec2                                                | 70.0   |      | 24 |
| MIBK/ H <sub>2</sub> O      | Al (NO <sub>3</sub> ) <sub>3</sub> ·9H <sub>2</sub> O | 140 | 60 | 72     | 2%   | 20 FPU/g, cellulase                                                   | 66.0   |      | 25 |
| MIBK/ H <sub>2</sub> O      | Al (NO <sub>3</sub> ) <sub>3</sub> ·9H <sub>2</sub> O | 160 | 60 |        |      |                                                                       | 85.5   |      |    |
| MIBK/H <sub>2</sub> O       | H <sub>2</sub> SO <sub>4</sub>                        | 170 | 60 | 48     | 2%   | 20 mg/g Cellic® CTec2                                                 | 73.3   |      | 26 |
| MIBK/ H <sub>2</sub> O      | AlCl <sub>3</sub> /DES                                | 100 | 90 | 72     | 2%   | 15 FPU/g, cellulase                                                   | 30.3   |      | 27 |
| MIBK/ H <sub>2</sub> O      |                                                       | 120 |    |        |      |                                                                       | 57.3   |      |    |
| MIBK/ H <sub>2</sub> O      |                                                       | 140 |    |        |      |                                                                       | 80.8   |      |    |
| MIBK/ H <sub>2</sub> O      |                                                       | 160 |    |        |      |                                                                       | 77.0   |      |    |
| Pentanol /H <sub>2</sub> O  | H <sub>2</sub> SO <sub>4</sub>                        | 170 | 60 | 72     | 2%   | 15 FPU/g cellulase (CellicCtec-2)                                     | 92.1   |      | 31 |
| Pentanol / H <sub>2</sub> O | H <sub>2</sub> SO <sub>4</sub>                        | 120 | 30 | 72     | 2%   | 20 FPU/g cellulase                                                    | 92.6   |      | 32 |
| Pentanol /H <sub>2</sub> O  | H <sub>2</sub> SO <sub>4</sub>                        | 180 | 45 | 72     | 2%   | Cellic CTec2                                                          | 90.0   |      | 33 |
| Pentanol /H <sub>2</sub> O  | H <sub>2</sub> SO <sub>4</sub>                        | 160 | 60 | 72     | 10   | 15 FPU/g Cellic CTec2                                                 | 96.0   |      | 34 |
| Butanol /H <sub>2</sub> O   |                                                       |     |    |        |      |                                                                       | 82.0   |      |    |
| Ethanol /H <sub>2</sub> O   |                                                       |     |    |        |      |                                                                       | 50.0   |      |    |
| Dioxane/ H <sub>2</sub> O   |                                                       |     |    |        |      |                                                                       | 55.0   |      |    |
| Pentanol /H <sub>2</sub> O  | H <sub>2</sub> SO <sub>4</sub>                        | 170 | 45 | 72     | 10   | 15 FPU/g Cellic CTec2                                                 | 93.3   |      | 35 |
| Pentanol /H <sub>2</sub> O  | H <sub>2</sub> SO <sub>4</sub>                        | 170 | 45 |        |      |                                                                       | 88.6   |      |    |
| Pentanol /H <sub>2</sub> O  | p-TsOH                                                | 80  | 40 | 72     | N/A  | Cellic CTec2                                                          | 10 FPU | 22.0 | 36 |
|                             |                                                       |     |    |        |      |                                                                       | 15 FPU | 28.0 |    |
| Pentanol /H <sub>2</sub> O  | p-TsOH                                                | 100 | 40 |        |      |                                                                       | 10 FPU | 49.0 |    |
|                             |                                                       |     |    |        |      |                                                                       | 15 FPU | 61.0 |    |
| Pentanol /H <sub>2</sub> O  | p-TsOH                                                | 120 | 40 |        |      |                                                                       | 10 FPU | 73.2 |    |
|                             |                                                       |     |    | 15 FPU | 95.3 |                                                                       |        |      |    |

|                            |                                |     |     |    |     |                         |        |      |    |
|----------------------------|--------------------------------|-----|-----|----|-----|-------------------------|--------|------|----|
| Pentanol /H <sub>2</sub> O | p-TsOH                         | 140 | 40  |    |     |                         | 10 FPU | 77.0 |    |
|                            |                                |     |     |    |     |                         | 15 FPU | 98.0 |    |
| Pentanol /H <sub>2</sub> O | p-TsOH                         | 160 | 40  |    |     |                         | 10 FPU | 76.0 |    |
|                            |                                |     |     |    |     |                         | 15 FPU | 98.2 |    |
| Pentanol /H <sub>2</sub> O | p-TsOH                         | 180 | 40  |    |     |                         | 10 FPU | 78.0 |    |
|                            |                                |     |     |    |     |                         | 15 FPU | 98.1 |    |
| Pentanol /H <sub>2</sub> O | p-TsOH/1% mannitol             | 120 | 40  | 72 | 10  | 7.5 FPU/g Cellic CTec2  | 73.3   |      | 37 |
| Pentanol /H <sub>2</sub> O | p-TsOH/5% mannitol             |     |     |    |     |                         | 94.5   |      |    |
| Pentanol /H <sub>2</sub> O | p-TsOH/10% mannitol            |     |     |    |     |                         | 95.4   |      |    |
| Pentanol /H <sub>2</sub> O | p-TsOH/15% mannitol            |     |     |    |     |                         | 96.5   |      |    |
| Pentanol /H <sub>2</sub> O | p-TsOH                         |     |     |    |     |                         | 65.3   |      |    |
| Butanol/H <sub>2</sub> O   | H <sub>2</sub> SO <sub>4</sub> | 180 | 45  | 72 | 10  | Cellic CTec2            | 96.0   |      | 38 |
| Butanol/H <sub>2</sub> O   | H <sub>2</sub> SO <sub>4</sub> | 200 | 60  | 72 | 2%  | cellulase               | 2.5    | 44.0 | 39 |
|                            |                                |     |     |    |     |                         | 5      | 76.0 |    |
|                            |                                |     |     |    |     |                         | 7.5    | 93.0 |    |
|                            |                                |     |     |    |     |                         | 10     | 98.0 |    |
| Butanol/H <sub>2</sub> O   | H <sub>2</sub> SO <sub>4</sub> | 180 | 45  | 72 | 2%  | Cellic CTec2            | 78.0   |      | 33 |
| Butanol/H <sub>2</sub> O   | H <sub>2</sub> SO <sub>4</sub> | 160 | 20  | 72 | 13% | 84 FPU Cellic CTec2     | 89.0   |      | 42 |
| Butanol/H <sub>2</sub> O   | H <sub>2</sub> SO <sub>4</sub> | 175 | 120 | 72 | 9%  | 9.6 FPU<br>Cellic CTec2 | 75.3   |      | 43 |
|                            |                                |     | 60  |    |     |                         | 71.7   |      |    |
|                            |                                | 160 | 120 |    |     |                         | 76.9   |      |    |
|                            |                                |     | 60  |    |     |                         | 54.8   |      |    |
|                            |                                | 150 | 120 |    |     |                         | 49.8   |      |    |
|                            |                                |     | 60  |    |     |                         | 24.7   |      |    |
| Butanol/H <sub>2</sub> O   | H <sub>2</sub> SO <sub>4</sub> | 190 | 10  | 72 | 10% | Cellic Ctec3            | 20 FPU | 95.0 | 44 |

## References:

- 1 S. X. Li, M. F. Li, J. Bian, S. N. Sun, F. Peng and Z. M. Xue, *Bioresour Technol*, 2017, **243**, 1105–1111.
- 2 B. Xue, Y. Yang, M. Zhu, Y. Sun and X. Li, *Bioresour Technol*, 2018, **270**, 55–61.
- 3 D. Weidener, H. Klose, W. Leitner, U. Schurr, B. Usadel, P. D. de Maria and P. M. Grande, *ChemSusChem*, 2018, **11**, 2051–2056.
- 4 P. M. Grande, D. Weidener, S. Dietrich, M. Dama, M. Bellof, R. Maas, M. Pauly, W. Leitner, H. Klose and P. Domínguez De Mariá, *ACS Omega*, 2019, **4**, 14451–14457.
- 5 X. K. Li, Z. Fang, J. Luo and T. C. Su, *ACS Sustain Chem Eng*, 2016, **4**, 5804–5813.
- 6 P. M. Grande, J. Viell, N. Theyssen, W. Marquardt, P. Domínguez De Mariá and W. Leitner, *Green Chemistry*, 2015, **17**, 3533–3539.
- 7 A. Morone, R. A. Pandey and T. Chakrabarti, *Ind Crops Prod*, 2017, **99**, 7–18.
- 8 Q. Zhan, Q. Lin, Y. Wu, Y. Liu, X. Wang and J. Ren, *Bioresour Technol*, DOI:10.1016/j.biortech.2023.128887.
- 9 S. Sun, X. Cao, H. Li, Y. Zhu, Y. Li, W. Jiang, Y. Wang and S. Sun, *Polymers (Basel)*, DOI:10.3390/polym12030557.
- 10 I. Dávila, E. Diaz and J. Labidi, *Bioresour Technol*, DOI:10.1016/j.biortech.2021.125311.
- 11 G. Calvaruso, M. T. Clough and R. Rinaldi, *Green Chemistry*, 2017, **19**, 2803–2811.
- 12 Q. Zhang, Y. Deng, X. Tan, W. Wang, Q. Yu, X. Chen, C. Miao, Y. Guo, Y. Zhang, X. Zhuang and Z. Yuan, *Ind Crops Prod*, DOI:10.1016/j.indcrop.2020.112091.
- 13 W. Z. Yin, S. L. Zou, L. P. Xiao and R. C. Sun, *Chem Eng Sci*, DOI:10.1016/j.ces.2024.119828.
- 14 Q. Zhang, X. Tan, W. Wang, Q. Yu, Q. Wang, C. Miao, Y. Guo, X. Zhuang and Z. Yuan, *ACS Sustain Chem Eng*, 2019, **7**, 8678–8686.
- 15 X. Xie, M. Madadi, S. Al Azad, Y. Qiao, M. Elsayed, M. Aghbashlo and M. Tabatabaei, *Fuel*, DOI:10.1016/j.fuel.2024.130890.
- 16 Q. Zhang, C. Dai, J. Zhang, X. He, X. Tan, K. Zhang, X. Xu and X. Zhuang, *Int J Biol Macromol*, DOI:10.1016/j.ijbiomac.2023.123249.
- 17 Y. Zheng, X. Zhao, W. Lin, Q. Yong and C. Huang, *Ind Crops Prod*, DOI:10.1016/j.indcrop.2023.116663.
- 18 Q. Zhang, C. Dai, X. Tan, X. He, K. Zhang, X. Xu and X. Zhuang, *Bioresour Technol*, DOI:10.1016/j.biortech.2022.128477.
- 19 Y. Zhu, R. Tang, Y. Yu, Z. Yu, K. Wang, Y. Wang, P. Liu and D. Han, *Fermentation*, DOI:10.3390/fermentation9010061.
- 20 Q. Zhang, X. Tan, W. Wang, Q. Yu, X. Chen, C. Miao, Y. Guo, Y. Zhang, X. Zhuang, Y. Sun, X. Kong and Z. Yuan, *ACS Sustain Chem Eng*, 2020, **8**, 7649–7655.
- 21 X. Zhang, Y. Bai, X. Cao and R. Sun, *Bioresour Technol*, 2017, **238**, 1–6.
- 22 Q. Zhang, Z. Guo, X. Zeng, B. Ramarao and F. Xu, *Renew Energy*, 2021, **179**, 351–358.
- 23 Q. Zhang, H. Li, Z. Guo and F. Xu, *Polymers (Basel)*, DOI:10.3390/polym12020378.
- 24 K. G. Kalogiannis, L. Matsakas, J. Aspden, A. A. Lappas, U. Rova and P. Christakopoulos, *Molecules*, DOI:10.3390/molecules23071647.
- 25 Y. J. Li, X. F. Cao, S. N. Sun, T. Q. Yuan, J. L. Wen, X. L. Wang, L. P. Xiao and R. C. Sun, *Ind Crops Prod*, DOI:10.1016/j.indcrop.2020.112173.
- 26 Z. Chen, X. Bai, A. Lusi, W. A. Jacoby and C. Wan, *Bioresour Technol*, DOI:10.1016/j.biortech.2019.121708.
- 27 Z. K. Wang, X. J. Shen, J. J. Chen, Y. Q. Jiang, Z. Y. Hu, X. Wang and L. Liu, *Int J Biol Macromol*, 2018, **117**, 721–726.
- 28 S. Xu, D. Pan, Y. Wu, X. Song, L. Gao, W. Li, L. Das and G. Xiao, *Fuel Processing Technology*, 2018, **175**, 90–96.
- 29 T. Zhang, R. Kumar and C. E. Wyman, *RSC Adv*, 2013, **3**, 9809–9819.
- 30 A. Mittal, S. K. Black, T. B. Vinzant, M. O'brien, M. P. Tucker, D. K. Johnson and D. K. Johnson, *Production of Furfural from Process-relevant Biomass-derived Pentoses in a Biphasic Reaction System*, 2017.

- 31 M. K. Islam, S. Rehman, J. Guan, C. Y. Lau, H. Y. Tse, C. S. Yeung and S. Y. Leu, *Appl Energy*, DOI:10.1016/j.apenergy.2021.117653.
- 32 J. Liu, H. Hu, Z. Gong, G. Yang, R. Li, L. Chen, L. Huang and X. Luo, *Cellulose*, 2019, **26**, 3801–3814.
- 33 H. Teramura, K. Sasaki, T. Oshima, F. Matsuda, M. Okamoto, T. Shirai, H. Kawaguchi, C. Ogino, K. Hirano, T. Sazuka, H. Kitano, J. Kikuchi and A. Kondo, *Biotechnol Biofuels*, DOI:10.1186/s13068-016-0427-z.
- 34 M. Madadi, Zahoor, G. Song, K. Karimi, D. Zhu, M. Elsayed, F. Sun and A. Abomohra, *Bioresour Technol*, DOI:10.1016/j.biortech.2022.127503.
- 35 M. Madadi, Zahoor, S. W. A. Shah, C. Sun, W. Wang, S. S. Ali, A. Khan, M. Arif and D. Zhu, *Bioresour Technol*, DOI:10.1016/j.biortech.2022.128171.
- 36 M. Madadi, M. Elsayed, G. Song, R. Kumar, M. Mahmoud-Aly, B. Basak, B. H. Jeon and F. Sun, *Chemical Engineering Journal*, DOI:10.1016/j.cej.2023.142881.
- 37 M. Madadi, M. Elsayed, F. Sun, J. Wang, K. Karimi, G. Song, M. Tabatabaei and M. Aghbashlo, *Bioresour Technol*, DOI:10.1016/j.biortech.2023.128591.
- 38 Q. Schmetz, H. Teramura, K. Morita, T. Oshima, A. Richel, C. Ogino and A. Kondo, *ACS Sustain Chem Eng*, 2019, **7**, 11069–11079.
- 39 H. Teramura, K. Sasaki, T. Oshima, H. Kawaguchi, C. Ogino, T. Sazuka and A. Kondo, *Bioresour Technol*, 2018, **252**, 157–164.
- 40 Y. Kawamata, T. Yoshikawa, Y. Koyama, H. Ishimaru, S. Ohtsuki, E. Fumoto, S. Sato, Y. Nakasaka and T. Masuda, *Ind Crops Prod*, DOI:10.1016/j.indcrop.2020.113078.
- 41 S. Rivas, L. López, C. Vila and J. C. Parajó, *Bioresour Technol*, DOI:10.1016/j.biortech.2021.125967.
- 42 I. Salapa, C. Katsimpouras, E. Topakas and D. Sidiras, *Biomass Bioenergy*, 2017, **100**, 10–16.
- 43 A. Karnaouri, G. Asimakopoulou, K. G. Kalogiannis, A. A. Lappas and E. Topakas, *Bioresour Technol*, DOI:10.1016/j.biortech.2021.125846.
- 44 C. Vila, R. Yáñez and J. L. Alonso, *Ind Crops Prod*, DOI:10.1016/j.indcrop.2023.117581.
- 45 S. Rivas, R. Baldassari, J. C. Parajó and A. M. Raspolli Galletti, *Polymers (Basel)*, DOI:10.3390/polym15061553.
- 46 F. Foltanyi, J. E. Hawkins, I. Panovic, E. J. Bird, T. M. Gloster, C. S. Lancefield and N. J. Westwood, *Biomass Bioenergy*, DOI:10.1016/j.biombioe.2020.105680.
